# Supplementary material for: Substandard and falsified medical product recalls in Zambia from 2018 to 2021 and implications on the quality surveillance systems
Source: PubMed Central journal article supplement — J Med Access. 2022 Dec 25;6:27550834221141767. doi: 10.1177/27550834221141767 (PMC9806395; doi:10.1177/27550834221141767), 2022-12-25
Supplement: sj-pdf-2-map-10.1177_27550834221141767.pdf [file sj-pdf-2-map-10.1177_27550834221141767.pdf]

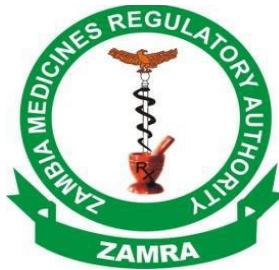

## **Zambia Medicine Regulatory Authority**

### **NOTICE TO THE PUBLIC**

#### **RECALL OF VITAMINE C (CEVITE)**

The Zambia Medicines Regulatory Authority wishes to notify members of the general public that the importer/distributor of the Vitamin C (cevite) that failed to meet quality requirements had instituted a voluntary recall in line with the terms and conditions of the Pharmaceutical Licence. Voluntary recall is also in adherence with the Good Distribution Practices (GDP) as provided for in the ZAMRA guidelines.

Members of the public are advised not to purchase or use Cevite Tablets bearing batch numbers **0371572** and **0372251**, all those that may have purchased or acquired batches of this product from health centers or pharmacies should return the products to Shalina Pharmaceuticals Limited or the source of the product.

Further, the Authority has taken due diligence to evaluate the quality of the other available batches to establish their quality.

#### **Issued by**

**Christabel Mutale Iliamupu (Mrs.)**

**Senior Public Relations Officer**

**Zambia Medicines Regulatory Authority**

**[Tel:+260 211 220 429](tel:+260211220429), Email: [pharmacy@zamra.co.zm](mailto:pharmacy@zamra.co.zm), Website: [www.zamra.co.zm](http://www.zamra.co.zm)**
